# Supplementary material for: Creation of interfacial phonons by carbon nanotube–polymer coupling
Source: Royal Society of Chemistry journal article supplement (doi:10.1039/b908166f), 2009-01-01
Supplement: b908166f.pdf [file b908166f.pdf]

Supplementary file

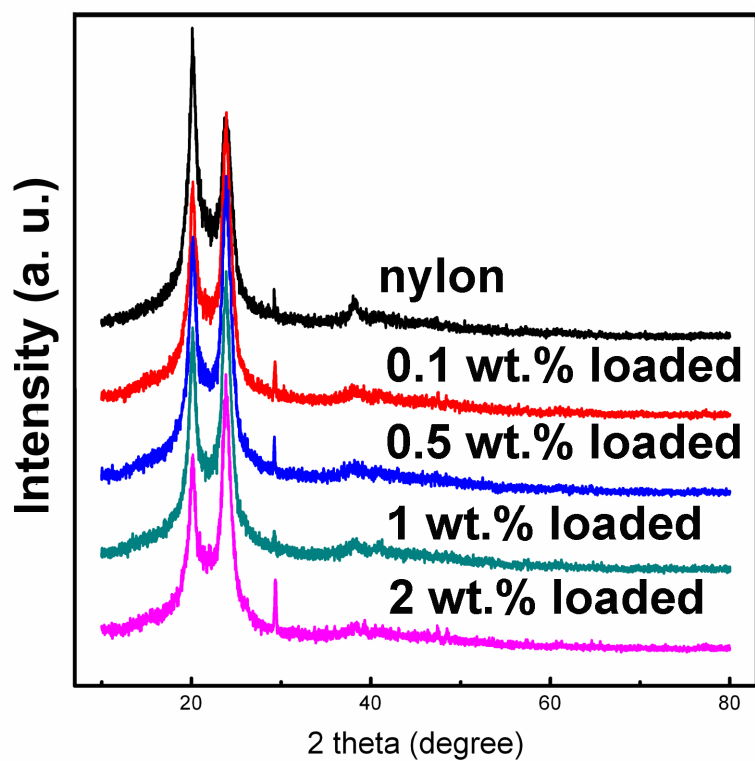

X-ray diffraction profiles of pure polymer and composites loaded with various  $f_{tube}$ .

The primary reflections at  $2\theta = 20^\circ$  and  $26^\circ$  correspond to separation between adjacent chains along a-axis ( $4.5\text{\AA}$ ) and zigzag  $\text{CH}_2$  units along b-axis ( $3.4\text{\AA}$ ), and

$\text{CNT}_{002}$  reflection is evident by enhanced adsorption at  $2\theta = 26^\circ$ .
